# Supplementary material for: Relish plays a dynamic role in the niche to modulate Drosophila blood progenitor homeostasis in development and infection
Source: eLife. 2021 Jul 22;10:e67158. doi: 10.7554/eLife.67158 (PMC8363268; doi:10.7554/eLife.67158)
Supplement: Figure 3—source data 1. [file elife-67158-fig3-data1.xlsx]

## Sheet: Wingless intensity analysis
	Mean fluorescence intensity of wingless
	Serial no	AntpGFPxw1118	AntpGFPxRelRNAi
	1	30.721	53.542
	2	27.75	49.157
	3	33.294	63.419
	4	31.376	48.823
	5	23.745	55.727
	6	22.883	48.422
	7	15.438	45.128
	8	39.872	40.075
	9	19.633	60.467
	10	14.152	42.628
	11	18.168	53.071
	12	32.283	43.172
	13	36.126	44.014
	14	37.175	47.429
	15	28.046	55.963
	sum	410.662	751.037
	Average	27.3775	50.0691
	standard deviation	8.06719	6.81452
	Ttest	5.82257e-09

## Sheet: PSC proliferation in wg mutant
Niche cell prolifertion
	Serial no	AntpGFPxw1118	AntpGFPxRel RNAi	AntpGFPxwgts	AntpGFPxwgts;Rel RNAi
	1	47	255	31	60
	2	44	154	38	52
	3	42	163	48	58
	4	52	195	42	51
	5	45	200	35	60
	6	42	156	40	57
	7	52	161	38	47
	8	47	196	37	54
	9	51	224	42	62
	10	47	223	36	48
	sum	469	1927	387	549
	Average	46.9	192.7	38.7	54.9
	Standard deviation	3.78447	34.2865	4.64399	5.27994
	Ttest	2.40999e-07		0.000439929	3.3658e-07

## Sheet: MZ area to total LG area ratio
Medullary zone area/Total area of the primary lobe
Serial no	AntpGFPxw1118	AntpGFPxRel RNAi	AntpGFPxwgts	AntpGFPxwgts;Rel RNAi
1	0.563	0.289	0.21	0.213
2	0.505	0.22	0.146	0.263
3	0.485	0.249	0.155	0.364
4	0.415	0.36	0.276	0.384
5	0.497	0.377	0.189	0.479
6	0.545	0.253	0.287	0.4
7	0.471	0.247	0.264	0.382
8	0.382	0.229	0.318	0.36
9	0.694	0.317	0.207	0.217
10	0.503	0.319	0.191	0.165
sum	5.06	2.86	2.243	3.227
Average	0.506	0.286	0.2243	0.3227
Standard deviation	0.0853281	0.0551765	0.0584543	0.101333
Ttest	4.80468e-06	2.18095e-07	0.000387637

## Sheet: Differentiation index in wgRNAi
	Differentiation index
	Serial no	AntpGFPxw1118	AntpGFPxRel RNAi	AntpGFPxwgts	AntpGFPxwgts;Rel RNAi
	1	0.436	0.774	0.559	0.866
	2	0.451	0.715	0.535	0.691
	3	0.378	0.788	0.687	0.616
	4	0.38	0.818	0.612	0.757
	5	0.33	0.719	0.753	0.577
	6	0.434	0.599	0.587	0.694
	7	0.345	0.607	0.71	0.61
	8	0.361	0.472	0.887	0.745
	9	0.173	0.89	0.702	0.648
	10	0.264	0.89	0.504	0.787
	sum	3.552	7.272	6.536	6.991
	Average	0.3552	0.7272	0.6536	0.6991
	Standard deviation	0.0852041	0.134728	0.116694	0.0903677
	Ttest	2.11304e-06	6.80451e-08	5.99925e-06

## Sheet: Niche prolifertion in wg RNAi
Niche cell proliferation
	serial no	AntpGFPxw1118	AntpGFPxRel RNAi(kk)	AntpGFPxwg RNAi	AntpGFPxRel RNAi,wg RNAi
	1	22	120	50	56
	2	42	120	40	30
	3	52	112	39	63
	4	45	123	29	67
	5	42	136	43	71
	6	52	130	21	55
	7	47	117	37	35
	8	51	151	13	40
	9	47	113	34	45
	10	55	115	53	50
				54
				38
	sum	455	1237	451	512
	average	45.5	123.7	37.5833	51.2
	standard deviation	9.3482	12.1842	12.3027	13.7259
	ttest	1.13255e-11	3.15116e-10	0.102227	0.29396

## Sheet: Differentiation index
		Differentiation index
		serial no	AntpGFPXw1118	AntpGFPXRel RNAi(kk)	AntpGFPxRel RNAi(KK),wg RNAi	AntpGFPxwg RNAi
		1	0.462409	0.976813	0.840251	0.702
		2	0.576608	0.757301	0.761757	0.504
		3	0.492397	0.921334	0.724301	0.663
		4	0.376697	0.860918	0.728564	0.73
		5	0.587173	0.857279	0.477113	0.579
		6	0.587559	0.841557	0.595973	0.738
		7	0.447643	0.96873	0.728564	0.736
		8	0.436733	0.890449	0.796204	0.562
		9	0.34513	0.890937	0.885397	0.562
		10	0.360575	0.878319	0.88262	0.746
		sum	4.67292	8.84364	7.42075	6.522
		average	0.467292	0.884364	0.742075	0.6522
		standard deviation	0.0926639	0.0636037	0.12714	0.0915457
		ttest	2.96631e-09	0.00730555	4.18407e-05	0.000283898

## Sheet: MZ area to Total LG area 
Medullary zone area/Total area of the primary lobe
Serial no	AntpGFPxw1118	AntpGFPxRel RNAi(kk)	AntpGFPxwg RNAi	AntpGFPxRel RNAi,wg RNAi
1	0.561	0.273	0.142	0.287
2	0.581	0.413	0.104	0.13
3	0.48	0.244	0.2	0.17
4	0.395	0.208	0.308	0.315
5	0.491	0.112	0.224	0.117
6	0.56	0.284	0.108	0.279
7	0.453	0.3	0.287	0.241
8	0.403	0.347	0.13	0.323
9	0.417	0.133	0.17	0.126
10	0.619	0.23	0.115	0.164
sum	4.96	2.544	1.788	2.152
Average	0.496	0.2544	0.1788	0.2152
Standard deviation	0.0802053	0.0912277	0.0740747	0.0823243
Ttest	6.7498e-06	3.41676e-08	4.03086e-07
