# Supplementary material for: Relish plays a dynamic role in the niche to modulate Drosophila blood progenitor homeostasis in development and infection
Source: eLife. 2021 Jul 22;10:e67158. doi: 10.7554/eLife.67158 (PMC8363268; doi:10.7554/eLife.67158)
Supplement: Figure 4—source data 1. [file elife-67158-fig4-data1.xlsx]

## Sheet: Fluorescence intensity of Hh
	Mean fluorescence intensity of Hedgehog
	Serial no	AntpGFPxw1118	AntpGFPpxRel RNAi
	1	59.276	108.292
	2	51.986	110.87
	3	60.341	105.611
	4	51.82	101.13
	5	54.595	107.868
	6	49.901	107.688
	7	46.232	97.459
	8	48.686	104.059
	9	57.845	97.504
	10	47.38	101.273
	11	44.467	106.147
	12	65.335	115.116
	13	41.149	106.291
	14	35.76	103.618
	15	55.995	107.24
	sum	770.768	1580.17
	average	51.3845	105.344
	standard deviation	7.83661	4.73884
	Ttest	2.58555e-17

## Sheet: Fluorescence intensity of Ph
	Mean fluorescence intensity of Phalloidin
	serial no	AntpGFPxw1118	AntpGFPXRel RNAi
	1	85.499	215.797
	2	48.174	213.933
	3	78.315	200.317
	4	75.841	232.801
	5	66.152	231.666
	6	63.851	200.86
	7	38.104	198.839
	8	86.201	141.794
	9	58.169	215.539
	10	69.438	159.253
sum		669.744	2010.8
average		66.9744	201.08
Standard deviation		15.6384	29.444
ttest		5.66218e-09

## Sheet: Fluorescence intensity ofsinged
Mean fluorescence intensity of singed
serial no	AntpGFPxw1118	AntpGFPxRelRNAi
1	26.929	55.357
2	16.305	56.81
3	22.329	71.503
4	10.12	60.627
5	14.212	76.7
6	13.968	60.678
7	19.878	59.358
8	17.697	55.857
9	14.054	42.304
10	17.318	43.244
11	9.47	51.22
12	7.694	55.242
13	12.51	46.819
14	13.564	65.997
15	13.401	58.089
sum	229.449	859.805
average	15.2966	57.3203
standard deviation	5.02859	9.4893
ttest	7.00445e-13

## Sheet: Fluorescence intensity of Ena
mean Fluorescence intensity of Enabled
Serial no	AntpGFPxw1118	AntpGFPxRel RNAi
1	8.275	31.833
2	8.242	32.967
3	6.678	35.411
4	5.415	39.295
5	3.141	34.137
6	3.476	43.341
7	0.568	39.5
8	6.755	37.064
9	5.899	32.554
10	11.729	35.482
11	11.22	34.879
12	2.689	36.969
13	5.515	29.006
14	6.63	32.112
15	4.921	37.675
sum	91.153	532.225
average	6.07687	35.4817
standard deviation	3.02815	3.6416
ttest	8.1745e-20

## Sheet: Extracellular Hedgehog quantita
Control Antp>OreR			Experiment (Antp>UAS-relRNAi)
Distance_(pixels)	Gray_Value		Distance_(pixels)	Gray_Value
0	6.1333		0	3.44
1	7.44		1	2.0533
2	6.7133		2	1.66
3	9.2533		3	2.1867
4	16.3533		4	5.1733
5	17.7933		5	2.3333
6	9.88		6	4.22
7	7.96		7	2.52
8	11.0267		8	4.2067
9	11.8267		9	7.1
10	8.2733		10	5.1933
11	9.6133		11	5.08
12	9.36		12	4.4533
13	5.86		13	6.2867
14	6.6067		14	9.1267
15	10.36		15	12.2467
16	12.4667		16	15.7467
17	12.08		17	12.7667
18	13.0467		18	10.3667
19	9.04		19	9.5667
20	4.3333		20	2.4333
21	1.76		21	2.34
22	3.8733		22	1.38
23	3.8333		23	2.7133
24	2.5867		24	1.6533
25	3.32		25	0.9267
26	2.6067		26	3.3867
27	2.14		27	7.14
28	0.5333		28	2.8133
29	1.9467		29	1.48
30	6.1467		30	3.22
31	2.88		31	1.5533
32	2.7733		32	1.6667
33	2.6133		33	3.4933
34	0.6667		34	4.0733
35	0.54		35	1.6267
36	1.5467		36	1.56
37	4.1067		37	0.58
38	3.2267		38	1.42
39	0.86		39	1.4867
40	0.78		40	6.0067
41	1.6667		41	5.9133
42	0.06		42	4.9933
43	1.56		43	2.74
44	0.5533		44	3.0867
45	1.7133		45	0.62
46	2.32		46	0.6533
47	1.1133		47	1.7733
48	4.2667		48	5.4933
49	4.8667		49	2.6533
50	6.1133		50	2.8533
51	11.0667		51	3.54
52	7.1133		52	5.38
53	1.56		53	5.82
54	6.0067		54	5.7867
55	7.5267		55	4.4467
56	10.36		56	2.3733
57	5.6267		57	3.96
58	7.7333		58	6.1733
59	7.2467		59	8.66
60	0.48		60	3.26
61	2.1467		61	6.9
62	5.6667		62	6.92
63	13.5867		63	7.88
64	10.7867		64	7.28
65	10.2467		65	4.96
66	7.76		66	5.28
67	3.4267		67	8.8667
68	3.76		68	6.26
69	4		69	4.0867
70	4.78		70	8.04
71	9.86		71	2.8133
72	11.74		72	4.0467
73	11.6		73	1.9133
74	12.1		74	6.1267
75	6.5733		75	5.8667
76	3.3667		76	1.2067
77	2.7467		77	1.32
78	4.54		78	1.6267
79	8.1467		79	1.26
80	5.8067		80	2.4467
81	7.1267		81	2.94
82	7.36		82	3.0333
83	2.2467		83	5.46
84	2.0933		84	2.1667
85	5.04		85	2.6867
86	5.8267		86	3.56
87	11.1467		87	10.0867
88	7.86		88	9.3
89	11.2		89	4.1867
90	4.3733		90	1.5467
91	3.7667		91	2.04
92	5.84		92	1.3333
93	1.9533		93	2.5533
94	1.5067		94	2.68
95	1.5533		95	1.1867
96	3.4467		96	1.4133
97	5.5		97	3.1467
98	3.8533		98	4.3067
99	3.92		99	4.3067
100	3.78		100	0.5867
101	5.7933		101	3.0267
102	7.2933		102	3.2867
103	3.9267		103	2.9
104	1.76		104	3.0667
105	5.4733		105	4.5933
106	8.5667		106	4.84
107	8.1133		107	4.3467
108	8.0867		108	8.04
109	8.4667		109	5.5933
110	9.7533		110	4.6267
111	8.52		111	1.8667
112	6.98		112	1.3867
113	13.3		113	4.2267
114	12.16		114	3.06
115	7.18		115	3.2667
116	12.9133		116	3.0867
117	12.4133		117	3.0067
118	6.1667		118	2.6867
119	6.2933		119	1.3533
120	7.4467		120	2.4
121	10.0667		121	1.74
122	6.02		122	2.1133
123	3.46		123	1.6267
124	4.6867		124	1.2133
125	8.7867		125	0.6133
126	7.5933		126	0.62
127	15.22		127	2.1867
128	10.7733		128	1.8267
129	9.58		129	3.26
130	14.9133		130	2.18
131	14.12		131	4.44
132	11.24		132	2.4667
133	5.9		133	2.94
134	11.2067		134	4.6867
135	6.5133		135	4.9
136	10.8333		136	4.1
137	5.7867		137	2.64
138	6.52		138	8.2933
139	17.1467		139	2.2267
140	13.2533		140	2.54
141	8.6333		141	6.42
142	8.72		142	8.8667
143	6.8667		143	9.2667
144	6.7		144	13.1733
145	10.64		145	10.4667
146	8.1867		146	3.2867
147	8.3133		147	4.1533
148	9.9267		148	1.0667
149	7.5667		149	0.6333
150	1.3333		150	0.4133
151	3.5333		151	2.6533
152	0.74		152	3.3533
153	1.9667		153	6.44
154	3.3933		154	3.1667
155	7.8867		155	1.5133
156	7.5933		156	2.7533
157	2.1933		157	0.4133
158	3.0933		158	2.3267
159	2.8733		159	5.0333
160	2.1133		160	3.5067
161	4.92		161	1.7
162	1.94		162	1.3667
163	3.5333		163	4.7
164	0.8467		164	4.4333
165	2.4267		165	0.68
166	7.48		166	1.3533
167	9.5733		167	3.1933
168	10.0533		168	1.46
169	4.28		169	3.8067
170	1.4133		170	7.6467
171	4.34		171	2.9333
172	7.82		172	2.2067
173	3.94		173	1.2333
174	1.4267		174	0.0467
175	1.7333		175	3.72
176	2.7		176	6.7467
177	6.2867		177	3.7867
178	7.98		178	2.9467
179	10.4133		179	3.36
180	14		180	5.3867
181	5.6667		181	3.0067
182	3.6067		182	0.7133
183	7.32		183	6.5933
184	2.58		184	4.3133
185	11.22		185	2.14
186	12.8933		186	5.2867
187	7.7867		187	0.9267
188	5.1		188	1.7733
189	6.9467		189	4.02
190	9.9867		190	1.8267
191	6.1733		191	1.8333
192	8.4333		192	3.4
193	6.6867		193	2.3733
194	3.9867		194	1.6333
195	1.16		195	4.2067
196	2.6533		196	1.6267
197	5.1		197	1.6133
198	3.5667		198	1.5867
199	0.9733		199	0.52
200	3.22		200	0
201	3.4533		201	0.7533
202	3.76		202	1.9533
203	3.5467		203	0.3867
204	3.2067		204	2.8867
205	4.5533		205	2.1867
206	2.8867		206	2.6933
207	1.0267		207	1.3667
208	2.6933		208	2.1333
209	1.7867		209	1.6333
210	2.84		210	4.3733
211	3.9267		211	0.6667
212	2.9267		212	1.1067
213	0.98		213	0.1533
214	5.1267		214	0.1667
215	5.72		215	0.5333
216	5.94		216	0.2867
217	1.7133		217	0.0267
218	0.3		218	0.08
219	1.9133		219	2.8533
220	2.1933		220	5.36
221	2.3867		221	2.2
222	8.5333		222	1.8267
223	7.0867		223	0.68
224	9.0333		224	0.3933
225	7.9733		225	1.3067
226	2.3467		226	1.48
227	5.26		227	3.1333
228	2.14		228	2.0733
229	3.6267		229	1.8867
230	0.04		230	4.7267
231	0.4333		231	4.7067
232	1.72		232	0.74
233	2.0333		233	2.1067
234	4.64		234	0.6467
235	0.56		235	2.56
236	0.76		236	5.6067
237	3.84		237	2.7533
238	4.2667		238	0
239	8.04		239	2.7
240	9.8667		240	5.2133
241	4.68		241	1.4933
242	4.1		242	1.2333
243	5.42		243	0.54
244	8.2067		244	1.9467
245	6.2467		245	7.98
246	5.7		246	6.9467
247	6.7333		247	9.3667
248	4.8		248	3.52
249	5.6		249	1.3533
250	1.9267		250	4.26
251	1.6333		251	3.1667
252	4.8533		252	1.6867
253	3.6667		253	3.8267
254	4.2333		254	2.7267
255	3.6933		255	3.52
256	4.7733		256	1.3933
257	2.7933		257	0.3533
258	2.8533		258	0.9267
259	4.7933		259	0.6267
260	3.0733		260	0.2333
261	2.3267		261	3.5333
262	2.16		262	0.6
263	2.74		263	1.38
264	1.8733		264	0.4067
265	4.1267		265	0.0733
266	1.8867		266	1.34
267	2.7467		267	1.56
268	6.6333		268	0.52
269	5.18		269	3.0733
270	5.06		270	4.2533
271	6.8933		271	4.0733
272	9.68		272	1.5667
273	6.86		273	0.5867
274	2.46		274	0.3867
275	4.2333		275	4.5867
276	2.96		276	7.8067
277	6.5267		277	3.1267
278	5.9		278	2.7467
279	3.8667		279	0.1533
280	3.4667		280	4.5667
281	8.6267		281	9.7867
282	4.5067		282	6.3733
283	1.7067		283	5.9
284	0.94		284	6.9933
285	3.0667		285	4.7933
286	1.6267		286	5.86
287	4.6467		287	3.26
288	3.4533		288	5.0533
289	5.4267		289	4.72
290	3.2933		290	6.9
291	3.18		291	4.9333
292	4.5733		292	2.72
293	3.7733		293	3.3867
294	8.9067		294	1.28
295	6.4067		295	0.9133
296	3.9267		296	1.4067
297	3.2267		297	4.7267
298	5.88		298	1.1533
299	5.56		299	2.04
300	5.92		300	4.2333
301	9.0667		301	1.9667
302	9.6333		302	2.3067
303	8.12		303	2.82
304	4.9667		304	4.3
305	4.0067		305	4.9867
306	7.4333		306	1.0733
307	5.8133		307	4.42
308	9.7867		308	5.1
309	11.04		309	3.0067
310	12.38		310	2.1
311	11.18		311	2.12
312	12.5		312	2.2733
313	15.4333		313	1.74
314	13.78		314	3.1333
315	15.0067		315	2.4667
316	18.9333		316	2.5867
317	12.4867		317	0.86
318	10.1067		318	3.2733
319	11.3267		319	3.4867
320	11.16		320	0.6067
321	12.86		321	4.4667
322	4.6133		322	3.06
323	9.36		323	2.3533
324	11.32		324	3.22
325	7.8067		325	1.04
326	7.02		326	5.6733
327	4.6533		327	4.44
328	10.84		328	2.3467
329	12.08		329	1.6467
330	9.2933		330	1.0267
331	7.0867		331	3.34
332	7.2533		332	3.06
333	12.2533		333	2.8867
334	14.7267		334	1.9933
335	22.1333		335	2.8333
336	16.12		336	2.28
337	17.0867		337	0.1333
338	14.68		338	0.5667
339	20.7533		339	0.1133
340	19.6933		340	2.44
341	19.8267		341	1.6867
342	17.6933		342	0.1067
343	30.2733		343	2.4
344	23.2733		344	1.08
345	11.7333		345	1.0133
346	15.88		346	2.2267
347	12.0667		347	1.5467
348	8.9667		348	1
349	15.3467		349	1.0333
350	11.5467		350	3.66
351	12.1933		351	0.76
352	11.58		352	2.06
353	11.0267		353	7.24
354	10.58		354	7.84
355	8.0467		355	2.7067
356	7.7667		356	5.9067
357	8.7267		357	6.88
358	5.54		358	2.56
359	8.2467		359	0.7133
360	2.3733		360	5.3267
361	1.8133		361	2.02
362	0.84		362	4.48
363	3.6533		363	1.9667
364	2.5467		364	2.2733
365	5.84		365	3
366	9.5333		366	1.0067
367	6.6667		367	2.0133
368	4.6533		368	1.88
369	2.56		369	2.7867
370	9.6733		370	1.28
371	10.3		371	3.7
372	4.62		372	7.5667
373	9.42		373	3.0533
374	7.98		374	5.1467
375	7.8467		375	4.4267
376	5.58		376	2.6933
377	10.2067		377	3.2867
378	8.6467		378	5.48
379	11.98		379	5.5667
380	14.0333		380	5.04
381	16.0467		381	7.46
382	14.7867		382	6.9733
383	6.56		383	7.8467
384	6.2333		384	5.9867
385	6.1733		385	4.84
386	6.76		386	1.3933
387	5.7467		387	4.2
388	3.1933		388	0.6267
389	1.5267		389	1.0267
390	3.72		390	2.04
391	3.02		391	0.9333
392	4.1667		392	3.3067
393	4.56		393	5.0267
394	3.8467		394	2.5133
395	3.4533		395	1.1867
396	6.58		396	2.1133
397	3.34		397	3.0133
398	3.2667		398	1.54
399	8.3		399	4.1867
400	13.46		400	4.4133
401	12.7		401	2.5067
402	7.6867		402	7.9
403	7.2333		403	3.56
404	5.88		404	2.4133
405	3.0667		405	1.5333
406	4.9733		406	3.3667
407	9.1133		407	4.2733
408	6.28		408	7.2933
409	3.5267		409	2.38
410	4.5267		410	2.0733
411	11.4467		411	6.8867
412	8.4467		412	4.76
413	5.7133		413	6.38
414	7.5533		414	5.8933
415	4.1133		415	11.6533
416	8.18		416	7.7133
417	11.84		417	13.94
418	8.8133		418	8.2533
419	13.8533		419	9.9867
420	18.0133		420	5.8667
421	13.8133		421	3.76
422	17.6333		422	8.8
423	15.6867		423	7.7733
424	9.04		424	15.08
425	5.4333		425	19.44
426	8.7933		426	17.24
427	5.7067		427	9.74
428	5.04		428	9.1
429	3.3467		429	14.6533
430	0.8533		430	10.8667
431	1.4133		431	9.0733
432	4.7667		432	10.6067
433	3.0133		433	6.12
434	3.02		434	14.0867
435	6.5867		435	19.4333
436	5.64		436	10.8133
437	4.6133		437	9.6333
438	5.6933		438	7.86
439	3.1133		439	5.3333
440	4.74		440	7.5933
441	1.4267		441	7.6333
442	4.1533		442	10.4
443	2.5533		443	8.42
444	4.9		444	9.4933
445	4.3267		445	10.8067
446	3.6933		446	27.4267
447	4.1467		447	23.66
448	7.8667		448	35.96
449	6.8933		449	25.4667
450	3.8667		450	27.2
451	3.2933		451	41.7
452	5.9867		452	33.6733
453	9.2333		453	40.4467
454	4.16		454	43.52
455	0.56		455	48.32
456	2.1		456	42.0867
457	5.46		457	45.4
458	5.6867		458	49.62
459	9.3533		459	54.8467
460	14.0733		460	56.3667
461	22.0733		461	57.6
462	10.7133		462	48.9533
463	15.8333		463	49.4067
464	21.6733		464	65.48
465	20.1933		465	65.7867
466	34.24		466	63.5333
467	37.14		467	63.8333
468	45.2333		468	63.6133
469	46.9133		469	52.0533
470	42.9333		470	50.3933
471	48.8		471	46.6067
472	33.5733		472	37.6267
473	29.3067		473	35.1133
474	35.04		474	37.5267
475	37.6667		475	36.6533
476	38.8533		476	31.9867
477	35.5267		477	46.68
478	39.1467		478	48.4067
479	36.9667		479	53.2733
480	23.6667		480	46.92
481	29.4933		481	42.3267
482	34.6333		482	44.92
483	38.4333		483	54.8067
484	36.0533		484	61.0333
485	33.9667		485	51.4333
486	42.0933		486	44.9467
487	56.88		487	36.7267
488	50.3933		488	32.6867
489	47.76		489	38.1733
490	45.82		490	32.5
491	46.32		491	33.02
492	42.32		492	39.5267
493	34.2533		493	42.22
494	39.8067		494	42.8133
495	48.3933		495	32.52
496	44.9333		496	34.0467
497	44.1867		497	26.68
498	44.6733		498	19.2333
499	48.48		499	17.7333

## Sheet: Filopodia quantitation
	Antp>GMA X OreR					Antp>GMA X relRNAi					Sample-wise filopodial quantitation
	S. no.	Filopodia per sample				S. no.	Filopodia per sample				Antp>GMA X OreR							Antp>GMA X relRNAi
	1	16				1	0				1	2	3	4	5	6		1	2	3	4	5	6
	2	13				2	0			1	2.888	7.211	10.067	3.369	2.282	4.87		0	0	0.743	2.296	3.048	2.87
	3	18				3	6			2	7.586	7.057	9.762	2.822	2.87	7.271		0	0	1.093	1.606	1.303	1.606
	4	20				4	4			3	3.832	2.357	6.448	2.365	10.107	5.704		0	0	1.296	1.283	1.303	0.413
	5	19				5	6			4	3.852	3.592	4.161	4.45	14.163	4.937		0	0	1.242	2.602	4.12	0.951
	6	13				6	7			5	2.366	4.056	5.355	5.103	46.616	6.265		0	0	0.955		1.49	4.272
	7	12				7	0			6	2.844	2.961	5.952	5.371	10.751	7.486		0	0	2.296		3.232	5.165
	8	16				8	0			7	6.416	4.516	3.66	4.674	17.07	10.428		0	0				4.097
	9	14				9	2			8	6.81	3.316	8.631	3.92	7.542	7		0	0
	10	15				10	4			9	3.815	3.528	12.463	3.113	15.378	5.153		0	0
										10	2.645	3.095	4.893	5.644	16.066	6.74		0	0
	AVERAGE	15.6					2.9			11	3.367	2.943	6.376	5.493	18.056	6.684		0	0
	STD DEV	2.71621					2.84605			12	3.287	3.233	6.183	5.312	25.919	2.345		0	0
										13	2.159	3.859	3.685	15.337	12.766	5.247		0	0
										14	2.744		3.789	3.49	9.497			0	0
										15	7.118		5.112	3.232	8.231			0	0
										16			5.342	3.048	10.957			0	0
										17			2.972	2.198	35.929			0	0
	t-test	Filopodia number					ttest	Filopodia length		18			7.117	3.407	6.404			0	0
	p-value	6.64029e-09					p value	9.19595e-10		19				3.991	8.035			0	0
										20				2.735				0	0
										Average	4.11527	3.97877	6.22044	4.4537	14.6652	6.16385		0	0	1.27083	1.94675	2.416	2.76771

## Sheet: Differentiation index Dia downr
	pCol X OreR					pCol X UAS-diaRNAi
	S.no.	Diff Cells	Total Cells	Diff Index		S.no.	Diff Cells	Total Cells	Diff Index
	1	9875.49	34039.6	0.290117		1	14529.6	27455	0.529216
	2	13239.8	34076.7	0.388529		2	17651	21692.9	0.813675
	3	12211.9	26381.2	0.462903		3	9696.53	16194.6	0.598751
	4	9403.16	35106.8	0.267844		4	9700.35	21088.5	0.459982
	5	18124.3	39233.7	0.461957		5	13369	23797.4	0.561787
	6	20626.2	45613.3	0.452197		6	15450.5	24003.2	0.643685
	8	9823.6	25486.4	0.385445		7	10856	18618.7	0.58307
	9	6643.43	20668.2	0.321432		8	15602.7	23278.4	0.670265
	10	8783.87	25338.9	0.346655		9	11532.8	25012.8	0.461076
	11	7817.64	23477.9	0.332979		10	17922.8	26400.8	0.678873
			AVERAGE	0.371006				AVERAGE	0.600038
			STD DEV	0.0711076				STD DEV	0.107697
			CONTROL	DIA RNAi
		average	0.371006	0.600038
		standard deviation	0.0711076	0.107697	4.28553e-05

## Sheet: Filopodia length in dia RNAi
	Sample-wise filopodial quantitation
	Antp>GMA X OreR										Antp>GMA X dia-RNAi
	1	2	3	4	5	6	7	8			1	2	3	4	5	6	7	8				AntpXOreR		AntpXdiaRNAi
1	3.094	29.764	10.34	7.715	2.605	0.99	5.578	6.735			1.188	1.401	2.657	1.85	2.525	6.422	3.543	2.41				3.094		1.188
2	6.047	7.62	8.434	3.81	2.039	2.245	15.688	3.943			0.99	1.597	1.253	1.321	1.905	2.494	4.011	2.068				6.047		0.99
3	6.769	3.652	6.102	3.614	2.179	1.541	12.485	2.571			0.99	3.224	2.02	2.061	1.923	4.386	1.585	2.106				6.769		0.99
4	11.205	7.008	9.493	3.2	2.521	2.119	2.978	3.633			1.794	1.067	2.773	1.515	3.017	2.851	2.851	4.451				11.205		1.794
5	5.942	6.034	6.102	4.517	9.567	1.704	3.03	5.683			1.12	0.99		0.886	3.072	1.884	1.73	4.968				5.942		1.12
6	4.285	3.902	14.009	3.39	24.131	3.546	4.136	4.856			1.508	1.597		1.12	1.159	1.261	2.801	6.734				4.285		1.508
7	4.964	11.344	3.297	4.006	7.177	4.675	5.154	2.179			2.215				1.923		1.379	3.543				4.964		2.215
8	3.652	6.816	6.488	4.011	3.297	7.308	4.62	2.569			2.258				3.792			1.681				3.652		2.258
9	7.401	5.63	3.652	4.451	2.45	2.02	4.675	2.263			0.817							0.84				7.401		0.817
10	7.783	8.796	5.744	1.826	2.836	1.585	3.784	3.249			1.188							4.04				7.783		1.188
11	4.358	4.517	2.694	5.936	5.233	3.556		6.846			1.981							2.694				4.358		1.981
12	9.214	3.922	2.575	8.825	2.133	1.428		4.285			0.626											9.214		0.626
13	5.15	4.136	5.165	5.744		4.426		2.913			1.205											5.15		1.205
14	9.282		4.16	5.747		2.032		2.913			1.597											9.282		1.597
15	9.904			6.415		1.684		3.733														9.904		2.41
16	6.449			3.1		2.887		4.042														6.449		2.068
17	2.241			3.642		2.887		2.412														2.241		2.106
18	2.537					3.274		4.474														2.537		4.451
19	3.408					2.525																3.408		4.968
20	2.133					2.385																2.133		6.734
21						1.442																29.764		3.543
																						7.62		1.681
																						3.652		0.84
							Average	5.12814									Avergae	2.23965				7.008		4.04
																						6.034		2.694
											Ttest	3.73269e-12										3.902		3.543
																						11.344		4.011
																						6.816		1.585
																						5.63		2.851
																						8.796		1.73
																						4.517		2.801
																						3.922		1.379
																						4.136		6.422
																						7.715		2.494
																						3.81		4.386
																						3.614		2.851
																						3.2		1.884
																						4.517		1.261
																						3.39		2.657
																						4.006		1.253
																						4.011		2.02
																						4.451		2.773
																						1.826		1.401
																						5.936		1.597
																						8.825		3.224
																						5.744		1.067
																						5.747		0.99
																						6.415		1.597
																						3.1		1.85
																						3.642		1.321
																						10.34		2.061
																						8.434		1.515
																						6.102		0.886
																						9.493		1.12
																						6.102		2.525
																						14.009		1.905
																						3.297		1.923
																						6.488		3.017
																						3.652		3.072
																						5.744		1.159
																						2.694		1.923
																						2.575		3.792
																						5.165
																						4.16
																						2.605
																						2.039
																						2.179
																						2.521
																						9.567
																						24.131
																						7.177
																						3.297
																						2.45
																						2.836
																						5.233
																						2.133
																						0.99
																						2.245
																						1.541
																						2.119
																						1.704
																						3.546
																						4.675
																						7.308
																						2.02
																						1.585
																						3.556
																						1.428
																						4.426
																						2.032
																						1.684
																						2.887
																						2.887
																						3.274
																						2.525
																						2.385
																						1.442
																						6.735
																						3.943
																						2.571
																						3.633
																						5.683
																						4.856
																						2.179
																						2.569
																						2.263
																						3.249
																						6.846
																						4.285
																						2.913
																						2.913
																						3.733
																						4.042
																						2.412
																						4.474
																						5.578
																						15.688
																						12.485
																						2.978
																						3.03
																						4.136
																						5.154
																						4.62
																						4.675
																						3.784
																					Sum	637.233		138.858
																					Average	5.12814		2.23965
																					Standard Deviation	3.90567		1.28629
																					Ttest	3.73269e-12

## Sheet: Filopodia number in Dia RNAi
	Antp>GMA X OreR					Antp>GMA X dia-RNAi
	S. no.	Filopodia per sample				S. no.	Filopodia per sample
	1		20			1		14
	2		13			2		6
	3		14			3		4		Average	15.625	7.75
	4		17			4		6		Standard deviation	3.96187	3.24037
	5		12			5		8
	6		21			6		6
	7		10			7		7
	8		18			8		11
Sum			125					62
Average			15.625					7.75
Standard deviation			3.96187					3.24037
				Ttest	0.000723734

## Sheet: DE-Cad level in Dia RNAi
Progenitor index
	Sl/No	AntpGFP/+	AntpGFPXDia RNAi
	1	0.54	0.22
	2	0.468	0.235
	3	0.36	0.405
	4	0.461	0.328
	5	0.377	0.303
	6	0.374	0.284
	7	0.477	0.243
	8	0.471	0.15
	9	0.426	0.143
	10	0.468	0.162
	Sum	4.422	2.473
	Average	0.4422	0.2473
	Standard deviation	0.0569713	0.0845696
	Ttest	1.811e-05

[truncated: 4 more sheets: DE-Cad level in Ena Rescue, Differentaition index in EnaKD, Ext Hh quantitation enai reli, Ext Hh quantitation diai]
