# Supplementary material for: Relish plays a dynamic role in the niche to modulate Drosophila blood progenitor homeostasis in development and infection
Source: eLife. 2021 Jul 22;10:e67158. doi: 10.7554/eLife.67158 (PMC8363268; doi:10.7554/eLife.67158)
Supplement: Figure 6—source data 1. [file elife-67158-fig6-data1.xlsx]

## Sheet: Differentiation index
	Differentiation index of EcRDN
		serial no	AntpGFPxw1118	AntpGFPxRelRNAi	AntpGFPxEcR DN
		1	0.344377	0.703257	0.757118
		2	0.369094	0.697545	0.74357
		3	0.500588	0.730351	0.814109
		4	0.259964	0.796477	0.871889
		5	0.331804	0.783911	0.7862
		6	0.528167	0.715979	0.931374
		7	0.542973	0.526173	0.686367
		8	0.590543	0.800702	0.814369
		9	0.336195	0.731802	0.817673
		10	0.63036
		sum	4.43406	6.4862	7.22267
		Average	0.806194	1.29724	1.44453
		Standard deviation	0.129056	0.0829592	0.0717758
		Ttest	4.29133e-05	2.15882e-06

## Sheet: Niche cell proliferation
Niche cell proliferation
serial no	ore R	axenic	PGRPLB delta
1	53	51	39
2	56	57	55
3	54	66	51
4	56	58	125
5	60	65	57
6	50	62	64
7	48	35	59
8	61	68	49
9	60	102	67
sum	498	564	566
average	55.3333	62.6667	62.8889
standard deviation	4.55522	17.8466	24.7308
ttest	0.262712	0.392094

## Sheet: Niche prolifertion in EcR DN
Niche cell proliferation
serial no	AntpGFPXW1118	AntpGFPxRel RNAi	AntpGFPxEcRDN
1	53	136	145
2	50	105	88
3	45	92	150
4	55	88	82
5	50	140	100
6	55	145	110
7	43	119	72
8	58	78	129
9	47	95	140
10	61	154	98
sum	517	1152	1114
average	51.7	115.2	111.4
standard deviation	5.75519	27.1408	27.9333
ttest	3.10444e-05	6.64282e-05

## Sheet: Fluorescence intensity of Rel
	Mean fluorecence intensity of Relish
		serial no	pcolGFPxw1118	pcolGFPxRelRNAi	pcolGFPxEcRDN
		1	69.262	27.547	28.405
		2	68.201	30.736	26.611
		3	65.735	20.789	22.612
		4	83.385	23.578	28.308
		5	75.8	22.419	23.832
		6	62.941	26.263	29.719
		7	67.564	27.475	27.498
		8	66.565	32.914	30.666
		9	61.802	28.549	29.594
		10	65.479	18.222	27.694
		sum	686.734	258.492	274.939
		average	68.6734	25.8492	27.4939
		standard deviation	6.43239	4.56414	2.55992
		ttest	7.81729e-12	3.76393e-10

## Sheet: Niche proliferation rescue
Niche cell proliferation
serial no	pcolGFPxw1118	pcolGFPxEcRDN	pcolGFPxUAS-Rel	pcolGFPxUAS-EcRDN;UAS-Rel
1	58	150	21	45
2	53	143	38	43
3	45	126	24	28
4	47	130	27	18
5	35	128	35	20
6	55	174	20	36
7	46	141	25	27
8	38	156	31	31
9	54	119	18	29
10	40	127	21	32
	47		29
sum	518	1394	289	309
average	47.0909	139.4	26.2727	30.9
standard deviation	7.40884	16.8931	6.4357	8.72353
ttest	3.63255e-06	7.85805e-11	1.74964e-09

## Sheet: Differentiation rescue
	Differentiation resuce
	serial no	pcolGFPxw1118	pcolGFPxEcRDN	pcolGFPxUAS-Rel	pcolGFPxUAS-EcRDN;UAS-Rel
	1	0.383	0.77	0.198	0.56
	2	0.329	0.736	0.351	0.521
	3	0.592	0.797	0.277	0.512
	4	0.179	0.794	0.318	0.369
	5	0.228	0.791	0.314	0.204
	6	0.509	0.752	0.18	0.484
	7	0.252	0.7	0.295	0.326
	8	0.418	0.92	0.323	0.288
	9	0.381	0.802	0.192	0.598
	10	0.372	0.785	0.323	0.317
	sum	3.643	7.847	2.771	4.179
	Average	0.3643	0.7847	0.2771	0.4179
	Standard deviation	0.126108	0.0574593	0.0632077	0.133386
	Ttest	3.80664e-07	3.38797e-06	0.0720288

## Sheet: Fluorescence intensity of Rel 
	Mean fluorecence intensity of Rel transcrpit
		serial no	pcolGFPxw1118	pcolGFPxEcRDN
		1	51.075	19.674
		2	55.865	18.539
		3	55.641	15.931
		4	57.064	18.936
		5	48.763	19.146
		6	46.309	22.98
		7	55.889	18.174
		8	49.086	18.434
		9	42.866	22.038
		10	46.169	24.079
		Sum	508.727	197.931
		Average	50.8727	19.7931
		Standard deviation	5.00998	2.48752
		Ttest	1.56415e-10
