# Supplementary material for: Relish plays a dynamic role in the niche to modulate Drosophila blood progenitor homeostasis in development and infection
Source: eLife. 2021 Jul 22;10:e67158. doi: 10.7554/eLife.67158 (PMC8363268; doi:10.7554/eLife.67158)
Supplement: Figure 7—source data 1. [file elife-67158-fig7-data1.xlsx]

## Sheet: Rel ab analysis
Relish antibody intensity analysis
		unpricked	mock	infected
	1	32.792	26.524	5.797
	2	25.124	29.989	4.482
	3	29.906	18.563	6.124
	4	29.341	16.113	6.868
	5	25.523	16.691	2.361
	6	25.979	16.343	4.876
	7	27.575	11.026	5.737
	8	26.822	13.301	5.843
	9	24.509	17.752	6.725
	10	27.909	21.932	3.105
	11	25.73	20.138	11.201
	12	27.868	17.078	12.274
	13	25.631	14.507	8.674
	14	24.897	13.441	9.832
	15	24.749	15.188	10.462
	Sum	404.355	268.586	104.361
	Average	26.957	17.9057	6.9574
	Standard deviation	2.31936	5.05083	2.94022
	Ttest	4.02424e-06	6.62542e-18	2.50128e-07

## Sheet: Differentiation index
Pxn YFP expression
	serial no	mock	infected
	1	0.538	0.846
	2	0.596	0.734
	3	0.635	0.786
	4	0.477	0.81
	5	0.484	0.879
	6	0.664	0.847
	7	0.57	0.753
	8	0.556	0.746
	9	0.5	0.632
	10	0.6	0.676
	sum	5.62	7.709
	average	0.562	0.7709
	standard deviation	0.0633877	0.0785104
	ttest	4.65436e-06

## Sheet: MZ to total LG area ratio
Medullary zone area/Total area of the primary lobe
	serial no	mock	infected
	1	0.403	0.16
	2	0.503	0.217
	3	0.444	0.131
	4	0.421	0.173
	5	0.438	0.116
	6	0.303	0.282
	7	0.327	0.169
	8	0.369	0.179
	9	0.513	0.37
	10	0.482	0.264
	sum	4.203	2.061
	average	0.4203	0.2061
	standard deviation	0.0711103	0.0783049
	ttest	5.20522e-06

## Sheet: Niche proliferation 
Niche cell proliferation
	Serial no	mock	infected
	1	51	55
	2	46	56
	3	56	58
	4	52	60
	5	46	61
	6	40	64
	7	52	53
	8	46	69
	9	56	61
	10	43	66
	sum	488	603
	average	48.8	60.3
	standard deviation	5.41192	5.03433
	ttest	0.000112026
